# Supplementary material for: Synergistic effects between polyvinylpyrrolidone and oxygen vacancies on improving the oxidase-mimetic activity of flower-like CeO2nanozymes
Source: Royal Society of Chemistry journal article supplement (doi:10.1039/d0nr04177g), 2020-01-01
Supplement: d0nr04177g1.pdf [file d0nr04177g1.pdf]

## Supplementary Information

### **Synergistic effect between polyvinyl pyrrolidone and oxygen vacancies on improving oxidase-mimetic activity of flower-like CeO<sub>2</sub> Nanozymes**

Mingyun Zhu,<sup>a</sup> Yifeng Wen,<sup>a</sup> Shugui Song,<sup>a</sup> Anqi Zheng,<sup>a</sup> Jingcang Li,<sup>a</sup> Weiwei Sun,<sup>a</sup> Yunqian Dai,<sup>b,\*</sup> Kuibo Yin,<sup>a,\*</sup> Litao Sun,<sup>a,\*</sup>

<sup>a</sup>SEU-FEI Nano-Pico Center, Key Laboratory of MEMS of Ministry of Education, Southeast University, Nanjing, 210096, P. R. China

<sup>b</sup>School of Chemistry and Chemical Engineering, Southeast University, Nanjing, 211189, P. R. China

\*Address corresponding to: yinkuibo@seu.edu.cn, daiy@seu.edu.cn, and slt@seu.edu.cn

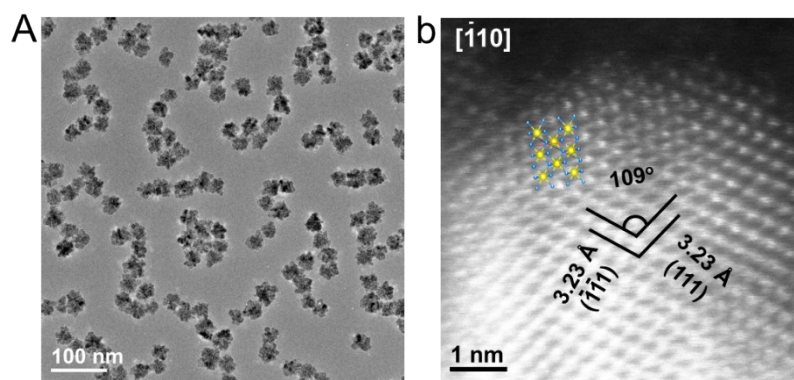

**Fig. S1** (a) TEM image, (b) High-resolution STEM image of the one representative CeO<sub>2</sub> nanoflower.

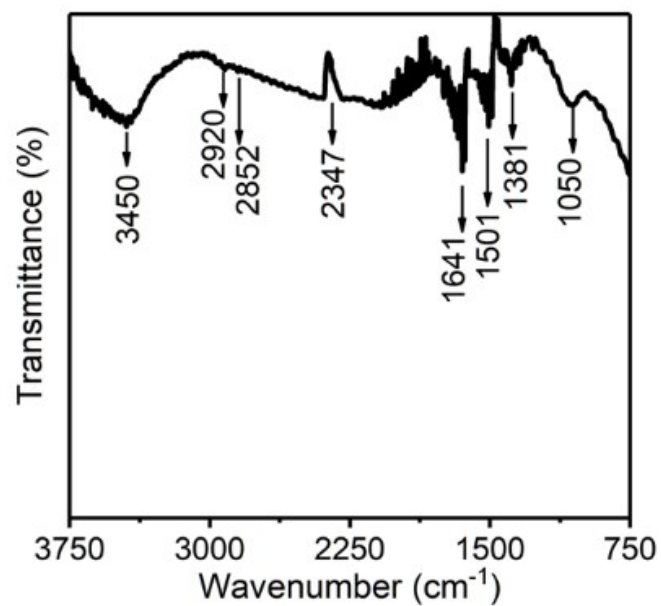

**Fig. S2** FTIR spectrum of CeO<sub>2</sub> nanoflowers.

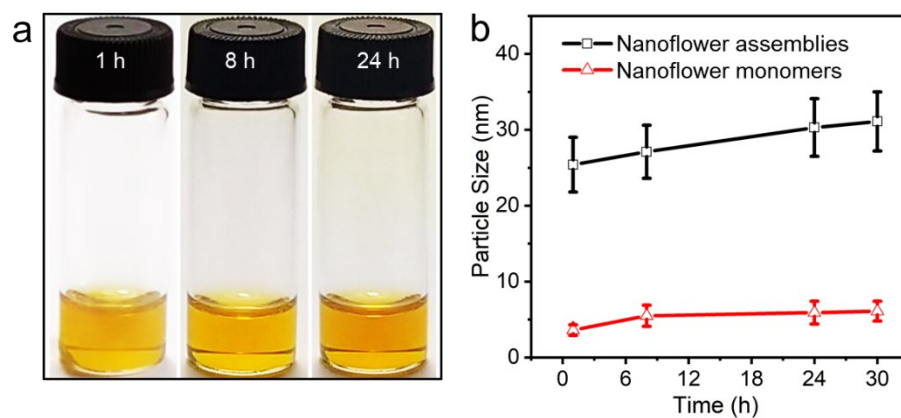

**Fig. S3** (a) Optical images and (b) average-size evolutions of nanoflower assemblies and monomers obtained at different solvothermal durations.

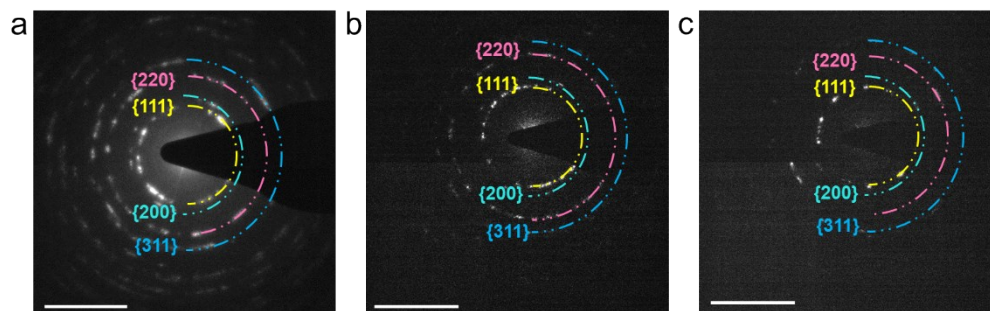

**Fig. S4** SAED patterns of CeO<sub>2</sub> nanoflowers obtained at different solvothermal durations: (a) 1 h, (b) 8 h, and (c) 24 h. Scale bar: 5 1/nm.

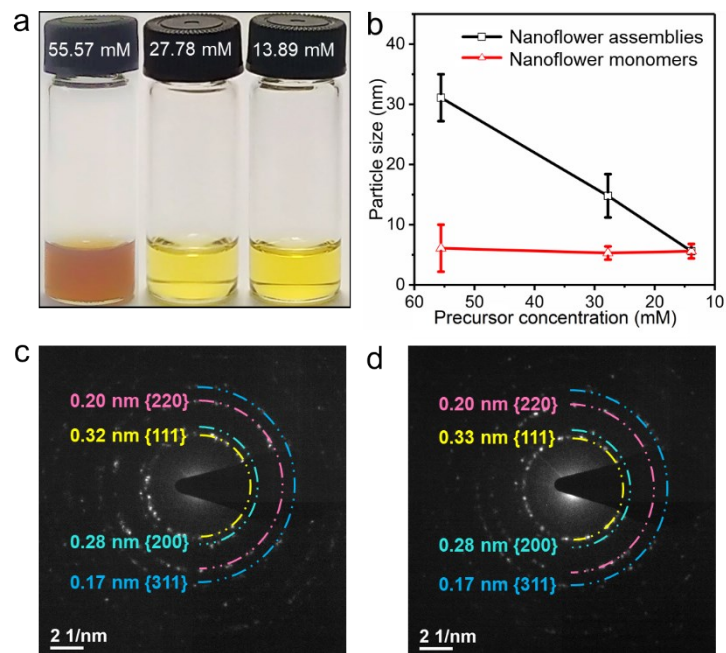

**Fig. S5** (a) Optical images, (b) average-size evolutions, and (c-d) SAED patterns of CeO<sub>2</sub> nanoflowers obtained from different precursor concentrations: (c) 27.78 mM, (d) 13.89 mM.

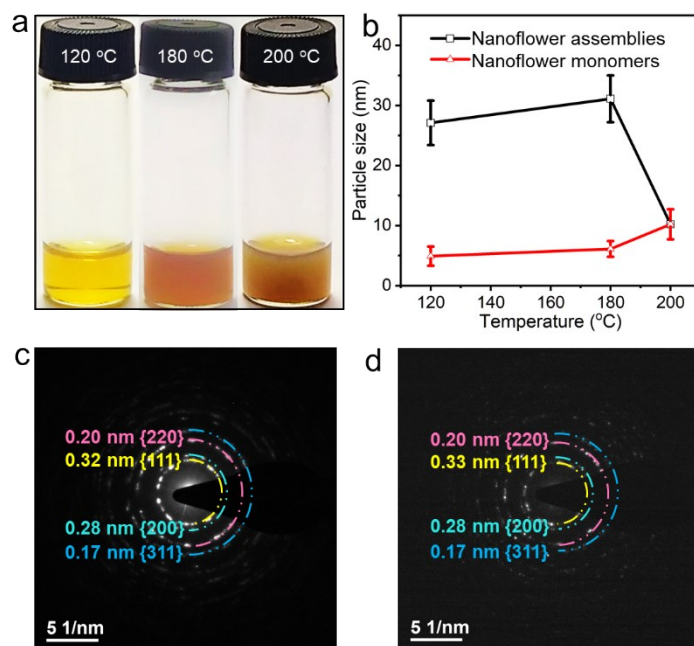

**Fig. S6** (a) Optical images, (b) average-size evolutions, and (c–d) SAED patterns of CeO<sub>2</sub> nanoflowers obtained at different reaction temperatures: (c) 120 °C, (d) 200 °C.

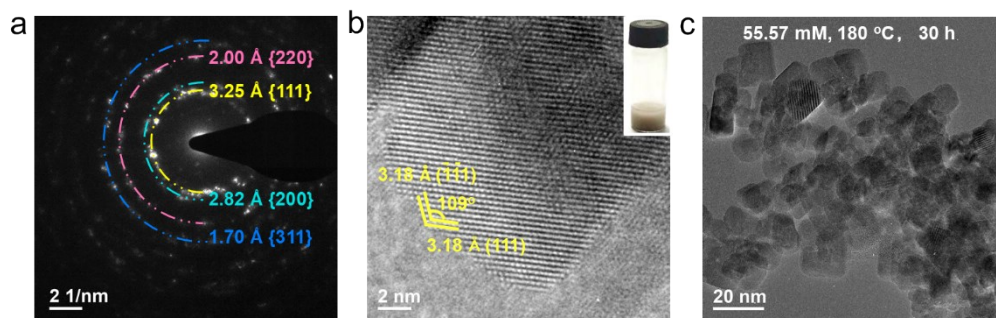

**Fig. S7** (a) SAED pattern, and (b–c) HRTEM images of  $\text{CeO}_2$  nanocubes obtained in the absence of PVP. Inset in (b) is the corresponding optical image.

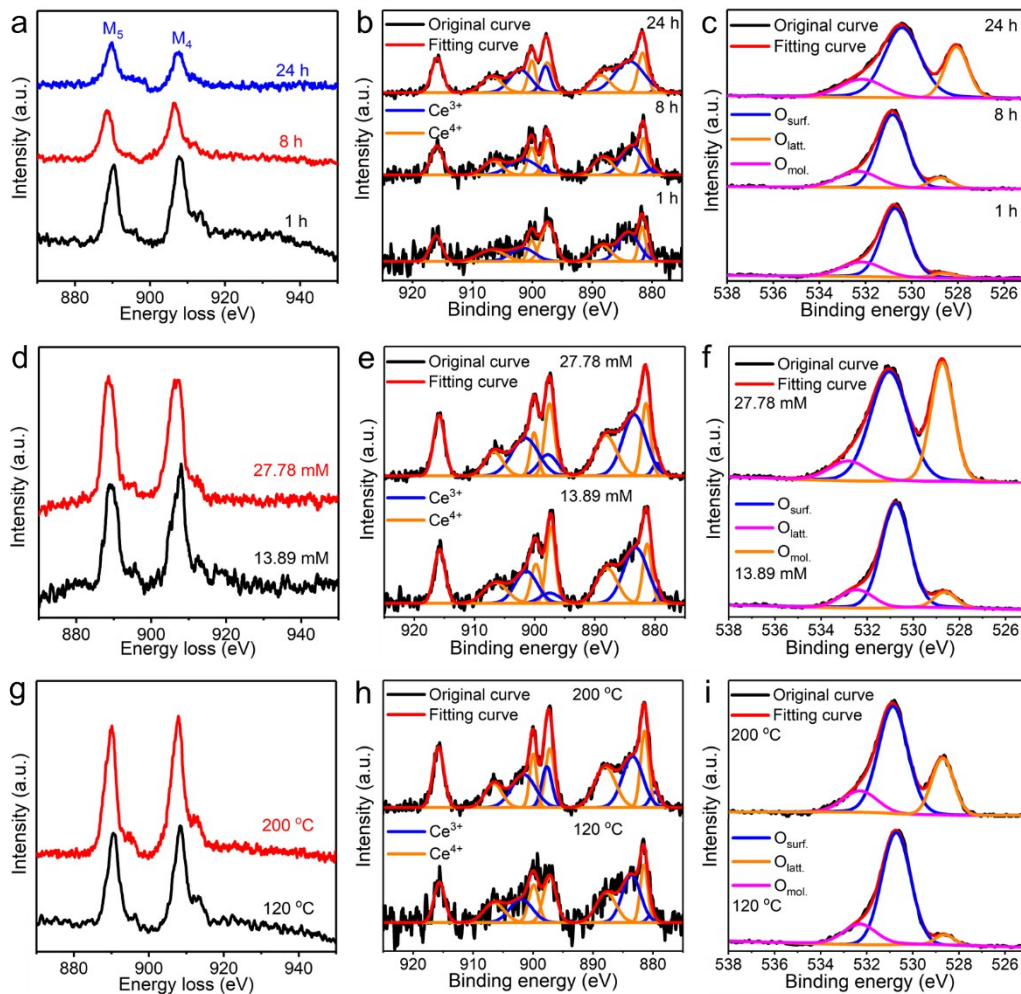

**Fig. S8** (a, d and g) EELS, and (b–c, e–f, and h–i) XPS spectra of a CeO<sub>2</sub> nanoflowers obtained at different conditions: (a–c) at different reaction durations, (d–f) from different precursor concentrations, (g–h) at different solvothermal temperatures. Specifically, EELS for Ce-M<sub>5,4</sub> edge, and XPS for Ce 3*d* and O 1*s*.

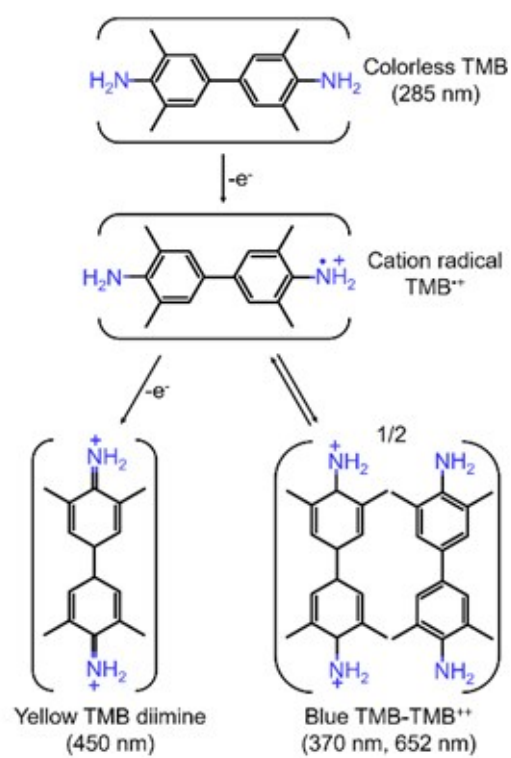

**Fig. S9** Oxidation process of TMB.

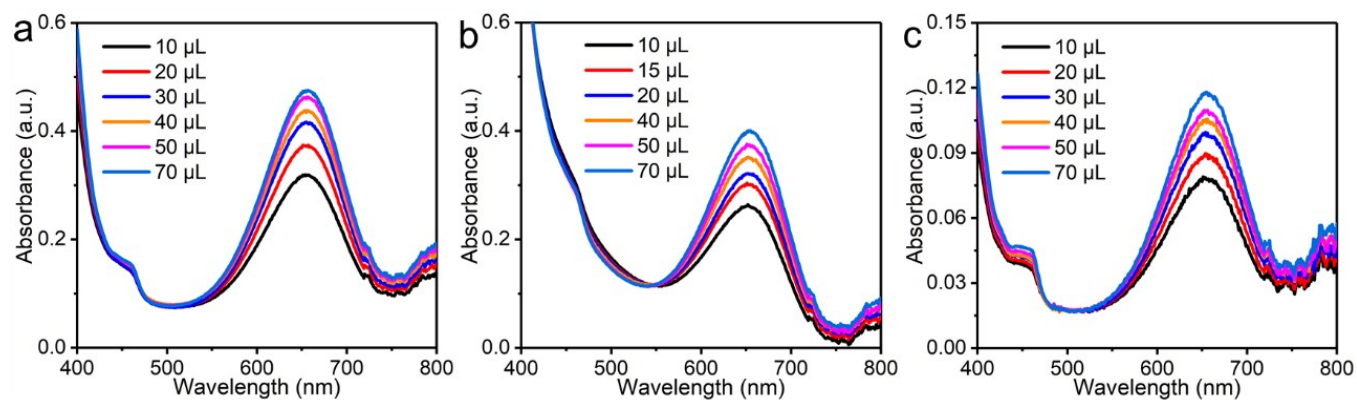

**Fig. S10** TMB-dependent UV-vis absorption spectra of the mixture containing (a) 2  $\mu\text{mol}$  of 31.1-nm  $\text{CeO}_2$  nanoflowers, (b) 0.5  $\mu\text{mol}$  of 5.6-nm  $\text{CeO}_2$  nanocubes, and (c) 2  $\mu\text{mol}$  of 10.1-nm  $\text{CeO}_2$  nanocubes. The concentration of the used TMB is 10 mM.

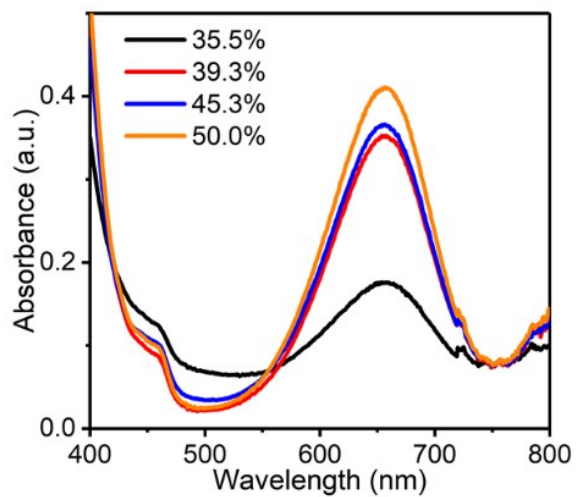

**Fig. S11** UV-vis absorption spectra of the TMB solutions catalyzed by CeO<sub>2</sub> nanoflowers with different Ce(III) percentages.

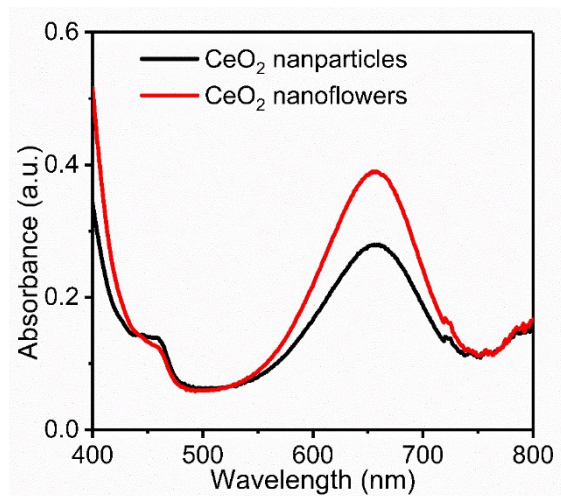

**Fig. S12** UV-vis spectra of TMB solution catalyzed by CeO<sub>2</sub> nanoparticles with different structures. Nanoflowers: 39.8% Ce(III) and 0.93 for M<sub>5</sub>/M<sub>4</sub>, nanoparticles: 39.9% Ce(III) and 0.93 for M<sub>5</sub>/M<sub>4</sub>.

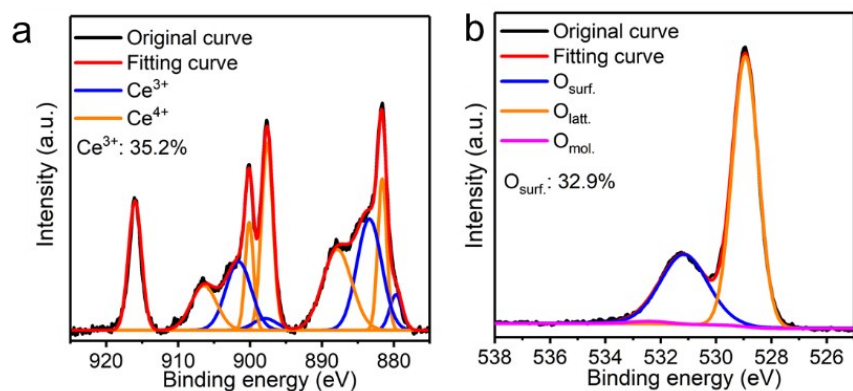

**Fig. S13** XPS spectra for (a) Ce 3d and (b) O 1s of the PVP-free CeO<sub>2</sub> nanocubes.

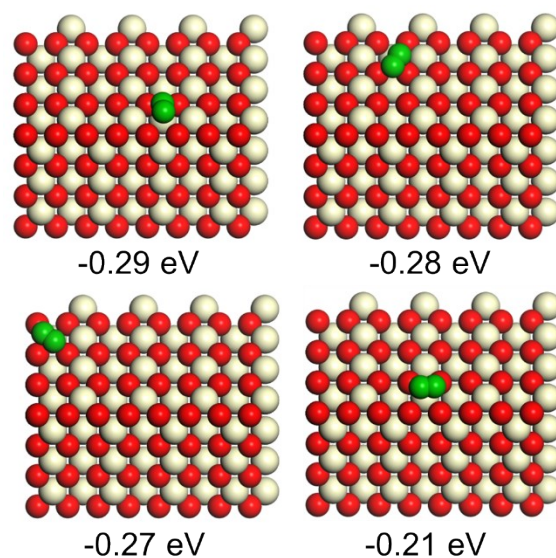

**Fig. 14** The adsorption energy of  $O_2$  on the  $\{220\}$  facet in different configuration models. Green: O atoms within  $O_2$ , red and light yellow: lattice O and Ce atoms within  $CeO_2$ .

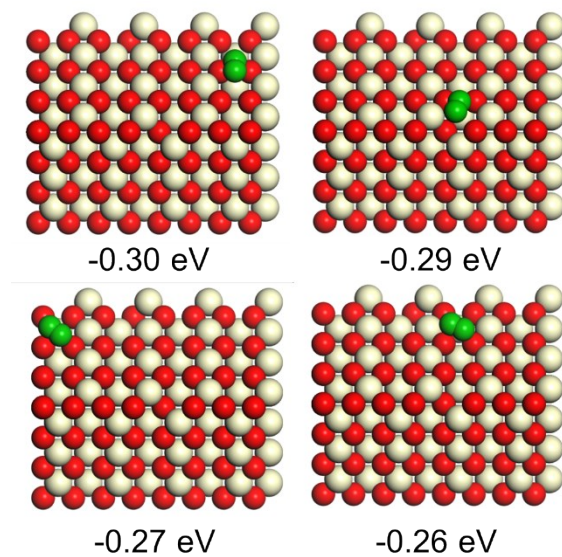

**Fig. 15** The adsorption energy of  $\text{O}_2$  (green) on the oxygen-deficient  $\{220\}$  facet in different configuration models. Green: O atoms within  $\text{O}_2$ , red and light yellow: lattice O and Ce atoms within  $\text{CeO}_2$ .

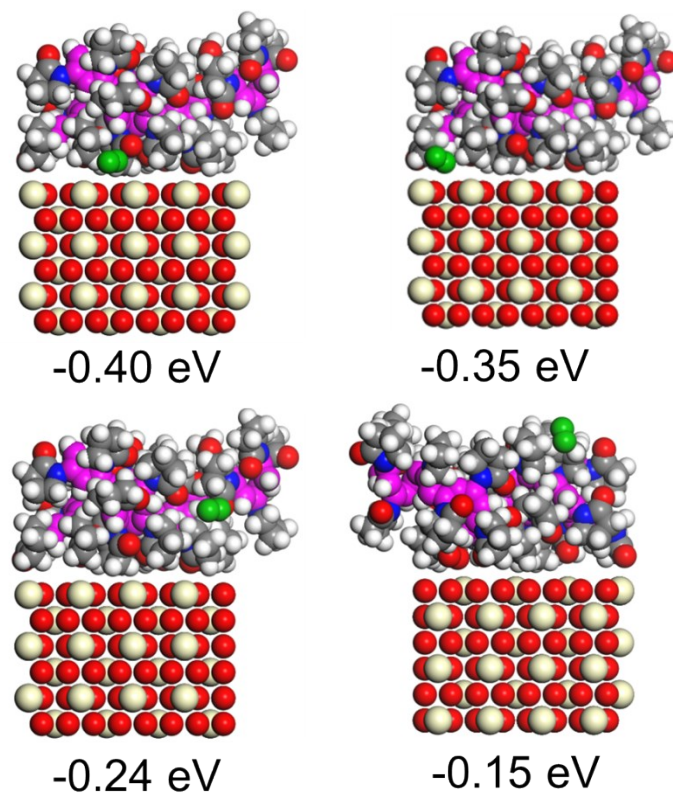

**Fig. 16** The adsorption energy of  $\text{O}_2$  (green) on the oxygen-deficient  $\{220\}$  facet with the existence of PVP in different configuration models. Green: O atoms within  $\text{O}_2$ ; red: O atoms within  $\text{CeO}_2$  and PVP; light yellow: lattice Ce atoms with  $\text{CeO}_2$ ; grey, blue and white: C, N and H atoms within PVP

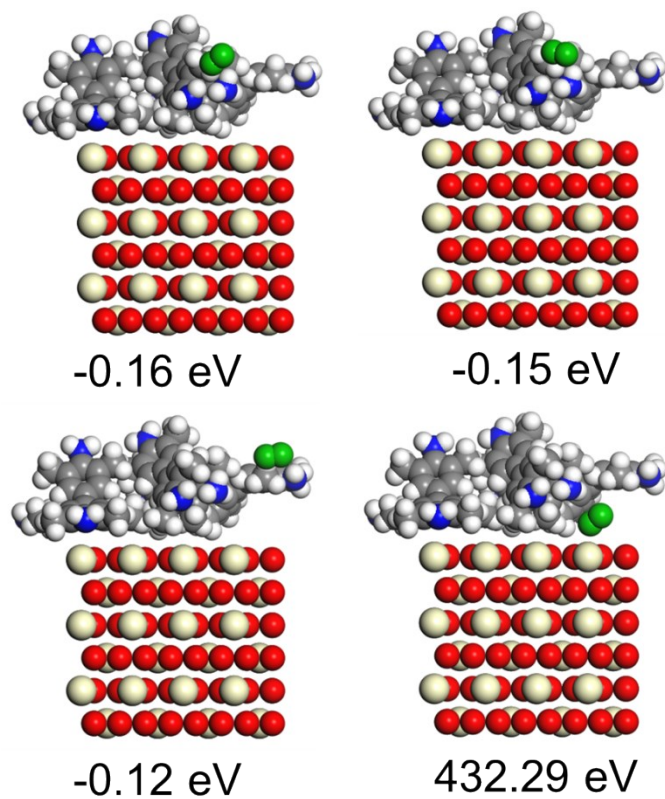

**Fig. 17** The adsorption energy of  $\text{O}_2$  (green) on the oxygen-deficient  $\{220\}$  facet with the existence of TMB in different configuration models. Green: O atoms within  $\text{O}_2$ ; red and light yellow: lattice O and Ce atoms within  $\text{CeO}_2$ ; grey, blue and white: C, N and H atoms within TMB.
